# Supplementary material for: Deep learning-enabled coronary CT angiography for plaque and stenosis quantification and cardiac risk prediction: an international multicentre study
Source: PubMed Central journal article supplement — Lancet Digit Health. Author manuscript; Available in PMC 2022 Apr 28. (PMC9047317; doi:10.1016/s2589-7500(22)00022-x), 2022-04
Supplement: NIHMS1791879-supplement-1.pdf [file NIHMS1791879-supplement-1.pdf]

# THE LANCET

## Digital Health

### Supplementary appendix

This appendix formed part of the original submission and has been peer reviewed.  
We post it as supplied by the authors.

Supplement to: Lin A, Manral N, McElhinney P, et al. Deep learning-enabled coronary CT angiography for plaque and stenosis quantification and cardiac risk prediction: an international multicentre study. *Lancet Digit Health* 2022; **4**: e256–265.

## CONTENTS

|                                                                                                                                              |    |
|----------------------------------------------------------------------------------------------------------------------------------------------|----|
| Supplementary Methods                                                                                                                        | 2  |
| <u>Supplementary Tables</u>                                                                                                                  |    |
| Supplementary Table 1. Clinical characteristics of the overall study population                                                              | 4  |
| Supplementary Table 2. CT scan parameters for each study site                                                                                | 5  |
| Supplementary Table 3. Performance of deep learning versus expert plaque measurements in the external validation cohort                      | 6  |
| Supplementary Table 4. Interobserver variability for expert reader plaque measurements                                                       | 7  |
| Supplementary Table 5. Reproducibility of deep learning plaque measurements using coronary centrelines derived from different expert readers | 8  |
| Supplementary Table 6. Diagnostic performance of deep learning for detection of significant stenosis                                         | 9  |
| <u>Supplementary Figures</u>                                                                                                                 |    |
| Supplementary Figure 1. Deep learning workflow for coronary segmentation                                                                     | 10 |
| Supplementary Figure 2. Architecture of the Hierarchical ConvLSTM Network                                                                    | 11 |
| Supplementary Figure 3. Noncalcified and calcified plaque volume measured by deep learning versus expert readers in the test set             | 12 |
| Supplementary Figure 4. Total plaque volume measured by deep learning versus expert readers in the external validation cohort                | 13 |
| Supplementary Figure 5. Per-patient CAD-RADS categorization by deep learning versus expert readers and invasive coronary angiography         | 14 |
| Supplementary Figure 6. Prognostic value of deep learning-based low-attenuation plaque burden for myocardial infarction                      | 15 |

## SUPPLEMENTARY METHODS

### Expert Plaque Measurements from CCTA

In axial and multiplanar views, the expert reader placed a region of interest in the ascending aorta to define normal blood pool contrast attenuation and control points in the coronary artery lumen to define the centreline. Atherosclerotic lesions were defined as any tissue  $\geq 1\text{mm}^2$  within or adjacent to the lumen that could be discriminated from surrounding pericardial tissue, epicardial fat, or lumen, and identified in  $\geq 2$  planes. In coronary segments  $\geq 1.5$  mm within the 18-segment SCCT model of the coronary tree<sup>1</sup>, the expert reader visually identified all lesions and manually defined their proximal and distal limits. Adaptive scan-specific Hounsfield Unit (HU) thresholds for plaque components were then automatically generated. Segmentation of the vessel wall and lumen were performed by a previously described algorithm<sup>2</sup>, with manual adjustment as required. Plaque volume ( $\text{mm}^3$ ) was calculated on a per-lesion level for the following components: total plaque, calcified plaque, noncalcified plaque, and low-attenuation plaque (fixed attenuation threshold  $< 30$  HU). The respective plaque burdens (%) were calculated as: plaque volume / analysed vessel segment volume  $\times 100$ . Quantitative diameter stenosis (%) was calculated as the ratio of minimal lumen diameter to the mean of 2 (proximal and distal) non-diseased reference points<sup>3</sup>.

### IVUS Image Analysis

Vessel (external elastic membrane) and lumen contours were manually traced at every 1-mm cross-section. Minimal luminal area was measured at the site of the smallest lumen. Total plaque volume was calculated as the vessel volume minus lumen volume<sup>4</sup>. Matching of lesions between IVUS and CCTA was performed by an independent observer blinded to the results of the CCTA analysis. Stretched multiplanar reformatted CCTA images were compared with longitudinal reconstructed IVUS datasets using at least two orthogonal catheter angiography views. The proximal and distal limits of plaques were matched using anatomical landmarks, such as distance from the aorto-coronary ostium, target lesions, side branches, or calcifications<sup>4</sup>.

### Training the Deep Learning Model

CCTA image data were normalized using minmax normalization. We used a pre-trained DenseNet and Xavier initialization<sup>5</sup> as the initial weights of the model. Optimization was performed using the Adam method<sup>6</sup> to minimize the Dice Loss and implemented with the Monai library. The learning rate started at  $1e-3$  and was dynamically reduced as the validation loss plateaued. Early stopping was utilized to reduce overfitting. The performance of the DL model was evaluated in the internal validation dataset using the Dice coefficient which measures the overlap between the ground truth and predicted output image, with values ranging from 0 (no overlap) to 1 (complete overlap). The model configuration providing the best Dice coefficient for internal validation was then applied to the test set.

## REFERENCES

1. Leipsic J, Abbara S, Achenbach S, et al. SCCT guidelines for the interpretation and reporting of coronary CT angiography: a report of the Society of Cardiovascular Computed Tomography Guidelines Committee. *J Cardiovasc Comput Tomogr.* 2014;8(5):342-358
2. Dey D, Schepis T, Marwan M, Slomka PJ, Berman DS, Achenbach S. Automated Three-dimensional Quantification of Noncalcified Coronary Plaque from Coronary CT Angiography: Comparison with Intravascular US. *Radiology.* 2010;257(2):516-22.
3. Dey D, Achenbach S, Schuhbaeck A, Pflederer T, Nakazato R, Slomka PJ, et al. Comparison of quantitative atherosclerotic plaque burden from coronary CT angiography in patients with first acute coronary syndrome and stable coronary artery disease. *J Cardiovasc Comput Tomogr.* 2014;8(5):368-74
4. Matsumoto H, Watanabe S, Kyo E, Tsuji T, Ando Y, Otaki Y, et al. Standardized volumetric plaque quantification and characterization from coronary CT angiography: a head-to-head comparison with invasive intravascular ultrasound. *Eur Radiol.* 2019;29(11):6129-39.
5. Glorot, Xavier & Bengio, Y. Understanding the difficulty of training deep feedforward neural networks. In: Proceedings of the 13<sup>th</sup> International Conference on Artificial Intelligence and Statistics, 2010 May 13-15, Sardinia, Italy. JMLR Workshop and Conference Proceedings. 2010;9:249-256.
6. Kingma DP, Ba J. Adam: A Method for Stochastic Optimization. *arXiv.* 2017; (published online Jan 30.) In: Proceedings of the 3rd International Conference for Learning Representations, 2015 May 7-9, San Diego, USA. New York: arXiv; 2017. Available from: <https://arxiv.org/abs/1412.6980>. Date accessed: July 7, 2021.

**Supplementary Table 1. Clinical characteristics of the overall study population (n=1,196)**

|                                           |            |
|-------------------------------------------|------------|
| Age (years)                               | 65.2±9.8   |
| Male sex                                  | 780 (65.2) |
| Diabetes mellitus                         | 221 (18.5) |
| Hypertension                              | 650 (54.3) |
| Dyslipidaemia                             | 746 (62.3) |
| Smoking (current or former)               | 448 (37.4) |
| Family history of coronary artery disease | 194 (16.2) |
| Prior coronary artery disease             | 393 (32.8) |

Data are n (%) or mean ± standard deviation.

**Supplementary Table 2. CT scan parameters for each study site**

| Cohort & Site           | CT scanner                            | Detector rows   | Voltage (kVp) | Matrix Size (pixels) | Pixel Size (mm) | Slice Thickness (mm) | Reconstruction                                       |
|-------------------------|---------------------------------------|-----------------|---------------|----------------------|-----------------|----------------------|------------------------------------------------------|
| <i>Training</i>         |                                       |                 |               |                      |                 |                      |                                                      |
| Cedars-Sinai I          | Siemens Definition & Definition Flash | Dual source 128 | 100, 120      | 512 × 512            | 0.35<br>0.39    | 0.3                  | Filtered back projection<br>Iterative reconstruction |
| MonashHeart             | Canon Aquilion ONE                    | 320             | 100, 120      | 512 × 512            | 0.37            | 0.25                 | Iterative reconstruction                             |
| Kusatsu Heart Center I  | GE Lightspeed                         | 64              | 120           | 512 × 512            | 0.39            | 0.6                  | Filtered back projection                             |
| Erlangen                | Siemens Definition                    | Dual source 128 | 120           | 512 × 512            | 0.30            | 0.4                  | Filtered back projection                             |
| DIAMOND                 | Siemens Biograph mCT                  | 128             | 120           | 512 × 512            | 0.36            | 0.5                  | Filtered back projection                             |
| PREFFIR - Aberdeen      | GE Discovery 710                      | 128             | 100, 120      | 512 × 512            | 0.40            | 0.6                  | Filtered back projection                             |
| PREFFIR - Manchester    | Siemens Definition AS                 | 64              | 100, 120      | 512 × 512            | 0.40            | 0.4                  | Filtered back projection                             |
| PREFFIR - Edinburgh     | Siemens Biograph mCT                  | 128             | 100, 120      | 512 × 512            | 0.32            | 0.5                  | Filtered back projection                             |
| <i>Testing</i>          |                                       |                 |               |                      |                 |                      |                                                      |
| SCOT-HEART - Site 1     | Phillips Brilliance                   | 64              | 100, 120      | 512 × 512            | 0.40            | 0.4                  | Filtered back projection                             |
| SCOT-HEART - Site 2     | Toshiba Aquilion ONE                  | 320             | 100, 120      | 512 × 512            | 0.35            | 0.25                 | Filtered back projection<br>Iterative reconstruction |
| SCOT-HEART - Site 3     | Siemens Biograph mCT                  | 128             | 100, 120      | 512 × 512            | 0.36            | 0.5                  | Filtered back projection                             |
| Cedars-Sinai II         | Siemens Definition & Definition Flash | Dual source 128 | 100, 120      | 512 × 512            | 0.35<br>0.39    | 0.5                  | Filtered back projection<br>Iterative reconstruction |
| Kusatsu Heart Center II | GE Lightspeed                         | 64              | 120           | 512 × 512            | 0.39            | 0.6                  | Filtered back projection                             |

CTA = computed tomography angiography. DIAMOND = Dual Antiplatelet Therapy to Reduce Myocardial Injury. ICA = invasive coronary angiography. PREFFIR = Prediction of Recurrent Events with 18F-Fluoride. SCOT-HEART = Scottish Computed Tomography of the Heart.

**Supplementary Table 3. Performance of deep learning versus expert plaque measurements in the external validation cohort (1,081 lesions)**

| <b>Plaque measurement</b>                        | <b>ICC (95% CI)</b> | <b>Spearman correlation</b> |
|--------------------------------------------------|---------------------|-----------------------------|
| Total plaque volume (mm <sup>3</sup> )           | 0.953 (0.946-0.959) | 0.910                       |
| Noncalcified plaque volume (mm <sup>3</sup> )    | 0.914 (0.901-0.926) | 0.855                       |
| Calcified plaque volume (mm <sup>3</sup> )       | 0.947 (0.939-0.954) | 0.917                       |
| Low-attenuation plaque volume (mm <sup>3</sup> ) | 0.827 (0.803-0.848) | 0.808                       |
| Vessel volume (mm <sup>3</sup> )                 | 0.991 (0.990-0.992) | 0.984                       |
| Diameter stenosis (%)                            | 0.882 (0.861-0.901) | 0.856                       |
| Total plaque burden (%)                          | 0.813 (0.759-0.822) | 0.787                       |
| Noncalcified plaque burden (%)                   | 0.811 (0.772-0.829) | 0.783                       |
| Calcified plaque burden (%)                      | 0.936 (0.926-0.944) | 0.883                       |
| Low-attenuation plaque burden (%)                | 0.808 (0.762-0.805) | 0.779                       |

CI = confidence interval. ICC = intraclass correlation coefficient.

**Supplementary Table 4. Interobserver variability for expert reader plaque measurements**

| <b>Plaque measurement</b>                        | <b>ICC (95% CI)</b> | <b>Spearman correlation</b> |
|--------------------------------------------------|---------------------|-----------------------------|
| Total plaque volume (mm <sup>3</sup> )           | 0.973 (0.963-0.981) | 0.949                       |
| Noncalcified plaque volume (mm <sup>3</sup> )    | 0.969 (0.957-0.978) | 0.940                       |
| Calcified plaque volume (mm <sup>3</sup> )       | 0.953 (0.935-0.967) | 0.919                       |
| Low-attenuation plaque volume (mm <sup>3</sup> ) | 0.915 (0.888-0.939) | 0.843                       |
| Vessel volume (mm <sup>3</sup> )                 | 0.994 (0.993-0.995) | 0.987                       |
| Diameter stenosis (%)                            | 0.919 (0.885-0.942) | 0.870                       |
| Total plaque burden (%)                          | 0.835 (0.768-0.883) | 0.795                       |
| Noncalcified plaque burden (%)                   | 0.831 (0.762-0.880) | 0.789                       |
| Calcified plaque burden (%)                      | 0.955 (0.936-0.968) | 0.914                       |
| Low-attenuation plaque burden (%)                | 0.824 (0.691-0.918) | 0.791                       |

CI = confidence interval. ICC = intraclass correlation coefficient.



**Supplementary Table 5. Reproducibility of deep learning plaque measurements using coronary centrelines derived from different expert readers**

| Plaque measurement                               | ICC (95% CI)        | Spearman correlation |
|--------------------------------------------------|---------------------|----------------------|
| Total plaque volume (mm <sup>3</sup> )           | 1 (1-1)             | 1                    |
| Noncalcified plaque volume (mm <sup>3</sup> )    | 0.998(0.997-0.998)  | 0.992                |
| Calcified plaque volume (mm <sup>3</sup> )       | 0.997 (0.995-0.998) | 0.979                |
| Low-attenuation plaque volume (mm <sup>3</sup> ) | 0.990 (0.986-0.993) | 0.976                |
| Vessel volume (mm <sup>3</sup> )                 | 1 (0.999-1)         | 0.998                |
| Diameter stenosis (%)                            | 0.975 (0.965-0.982) | 0.953                |
| Total plaque burden (%)                          | 0.979 (0.971-0.985) | 0.946                |
| Noncalcified plaque burden (%)                   | 0.979 (0.970-0.985) | 0.948                |
| Calcified plaque burden (%)                      | 0.984 (0.978-0.988) | 0.964                |
| Low-attenuation plaque burden (%)                | 0.986 (0.980-0.990) | 0.973                |

CI = confidence interval. ICC = intraclass correlation coefficient.

**Supplementary Table 6. Diagnostic performance of deep learning for detection of significant stenosis**

|                                                      |      |             | Sensitivity        | Specificity      | PPV              | NPV              | Accuracy         |
|------------------------------------------------------|------|-------------|--------------------|------------------|------------------|------------------|------------------|
| Deep Learning<br>vs<br>Expert CCTA Interpretation    | ≥50% | Per-vessel  | 95.4 (84.2-99.4)   | 95.3 (89.4-98.5) | 89.1 (77.7-95.1) | 98.1 (92.9-99.5) | 95.3 (90.6-98.1) |
|                                                      |      | Per-patient | 100.0 (85.8-100.0) | 88.5 (69.9-97.6) | 88.9 (73.4-95.9) | 100.0            | 94.0 (83.5-98.8) |
|                                                      | ≥70% | Per-vessel  | 94.4 (72.7-99.9)   | 99.2 (95.9-99.9) | 94.4 (70.6-99.2) | 99.2 (95.1-99.9) | 98.7 (95.3-99.8) |
|                                                      |      | Per-patient | 100.0 (69.2-100.0) | 97.5 (86.8-99.9) | 90.9 (59.1-98.6) | 100.0            | 98.0 (89.4-99.9) |
|                                                      |      |             |                    |                  |                  |                  |                  |
| Deep Learning<br>vs<br>Invasive Coronary Angiography | ≥50% | Per-vessel  | 97.9 (88.9-99.9)   | 91.2 (83.9-95.9) | 83.9 (73.7-90.7) | 98.9 (93.0-99.9) | 93.3 (88.1-96.8) |
|                                                      |      | Per-patient | 100.0 (89.7-100.0) | 68.8 (41.3-90.0) | 87.2 (76.7-93.4) | 100.0            | 90.0 (78.2-96.7) |
|                                                      | ≥70% | Per-vessel  | 90.5 (69.6-98.8)   | 97.7 (93.4-99.5) | 86.4 (67.2-95.1) | 98.4 (94.4-99.6) | 96.7 (92.4-98.9) |
|                                                      |      | Per-patient | 90.0 (68.3-98.8)   | 96.7 (82.8-99.9) | 94.7 (72.3-99.2) | 93.6 (79.5-98.2) | 94.0 (83.5-98.8) |

Data are percentage (95% confidence interval).

CCTA = coronary computed tomography angiography. NPV = negative predictive value. PPV = positive predictive value.

### Supplementary Figure 1. Deep learning workflow for coronary segmentation

The Hierarchical convolutional long short-term memory (ConvLSTM) Network performed segmentation of coronary computed tomography angiography (CCTA) images in a multitask approach for: 1) vessel wall; and 2) lumen and calcified plaque (blue and yellow overlay, respectively). All remaining voxels between the vessel wall and lumen were defined as noncalcified plaque (red overlay).

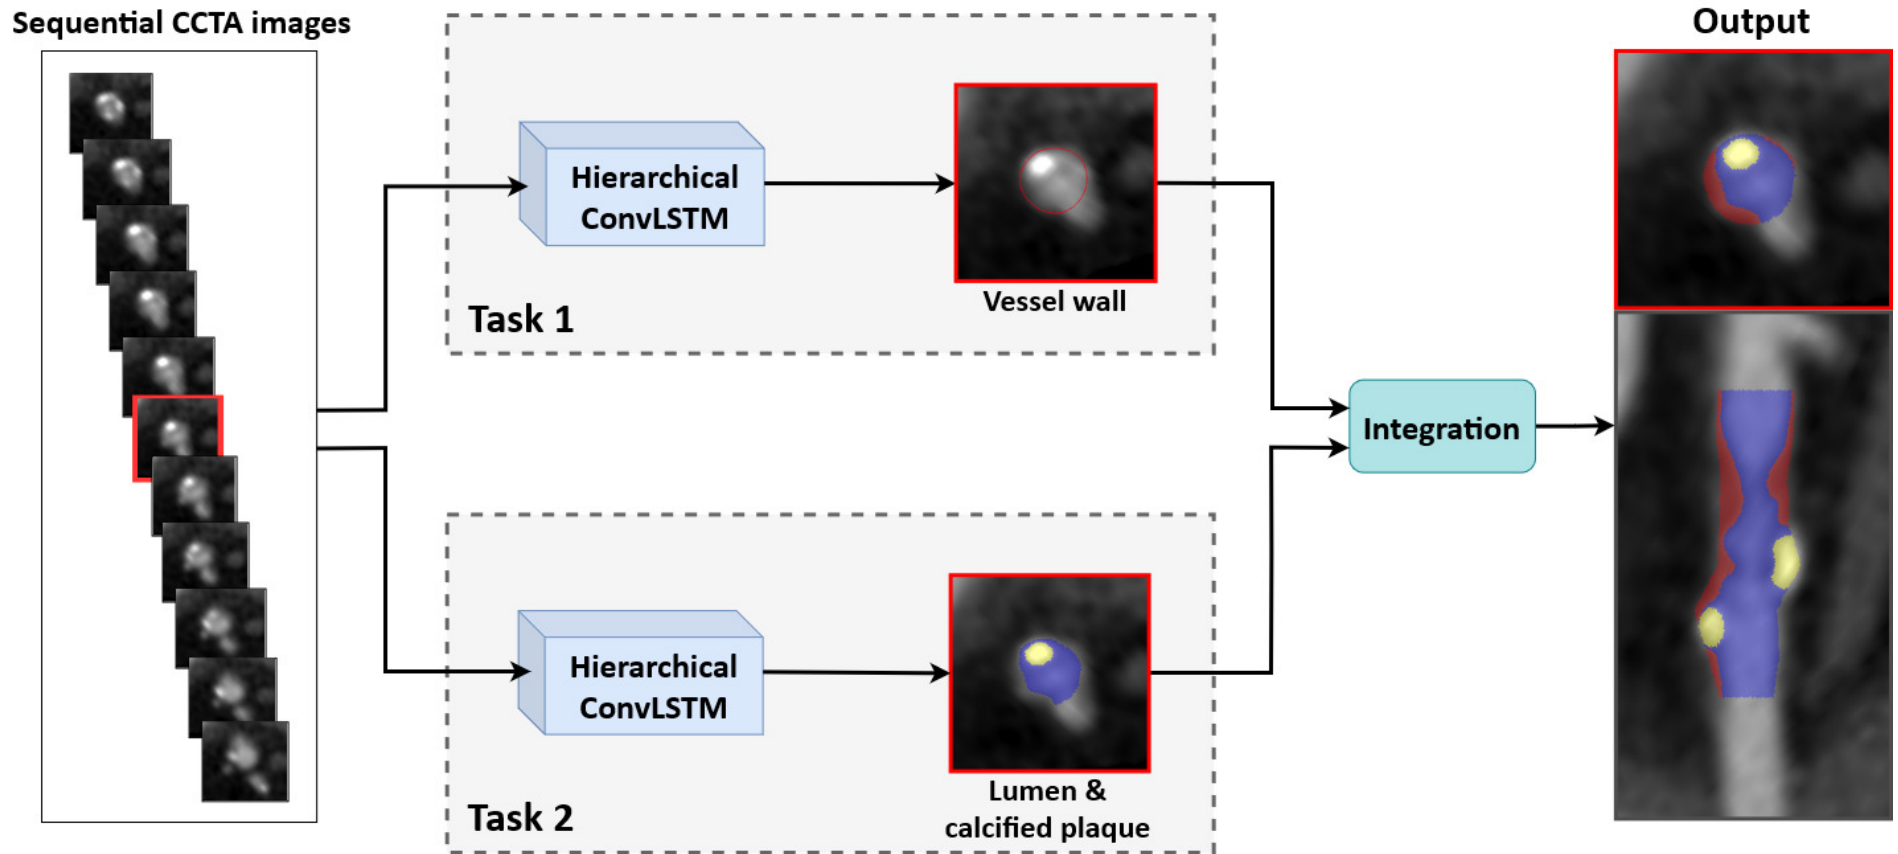

### Supplementary Figure 2. Architecture of the Hierarchical ConvLSTM Network

The Hierarchical ConvLSTM Network had two branches, each containing a feature extractor and segmentation head. The first branch used a ConvLSTM to extract features from the current cross-section as well as five adjacent sections on either side. The second branch used a DenseNet block to extract features from the current vessel cross-section. The segmentation head in both branches performed semantic segmentation using convolutional layers (Conv), batch normalization (Batch Norm), and a Leaky Rectified Linear Unit (ReLU). An attention head combined the outputs of both branches.

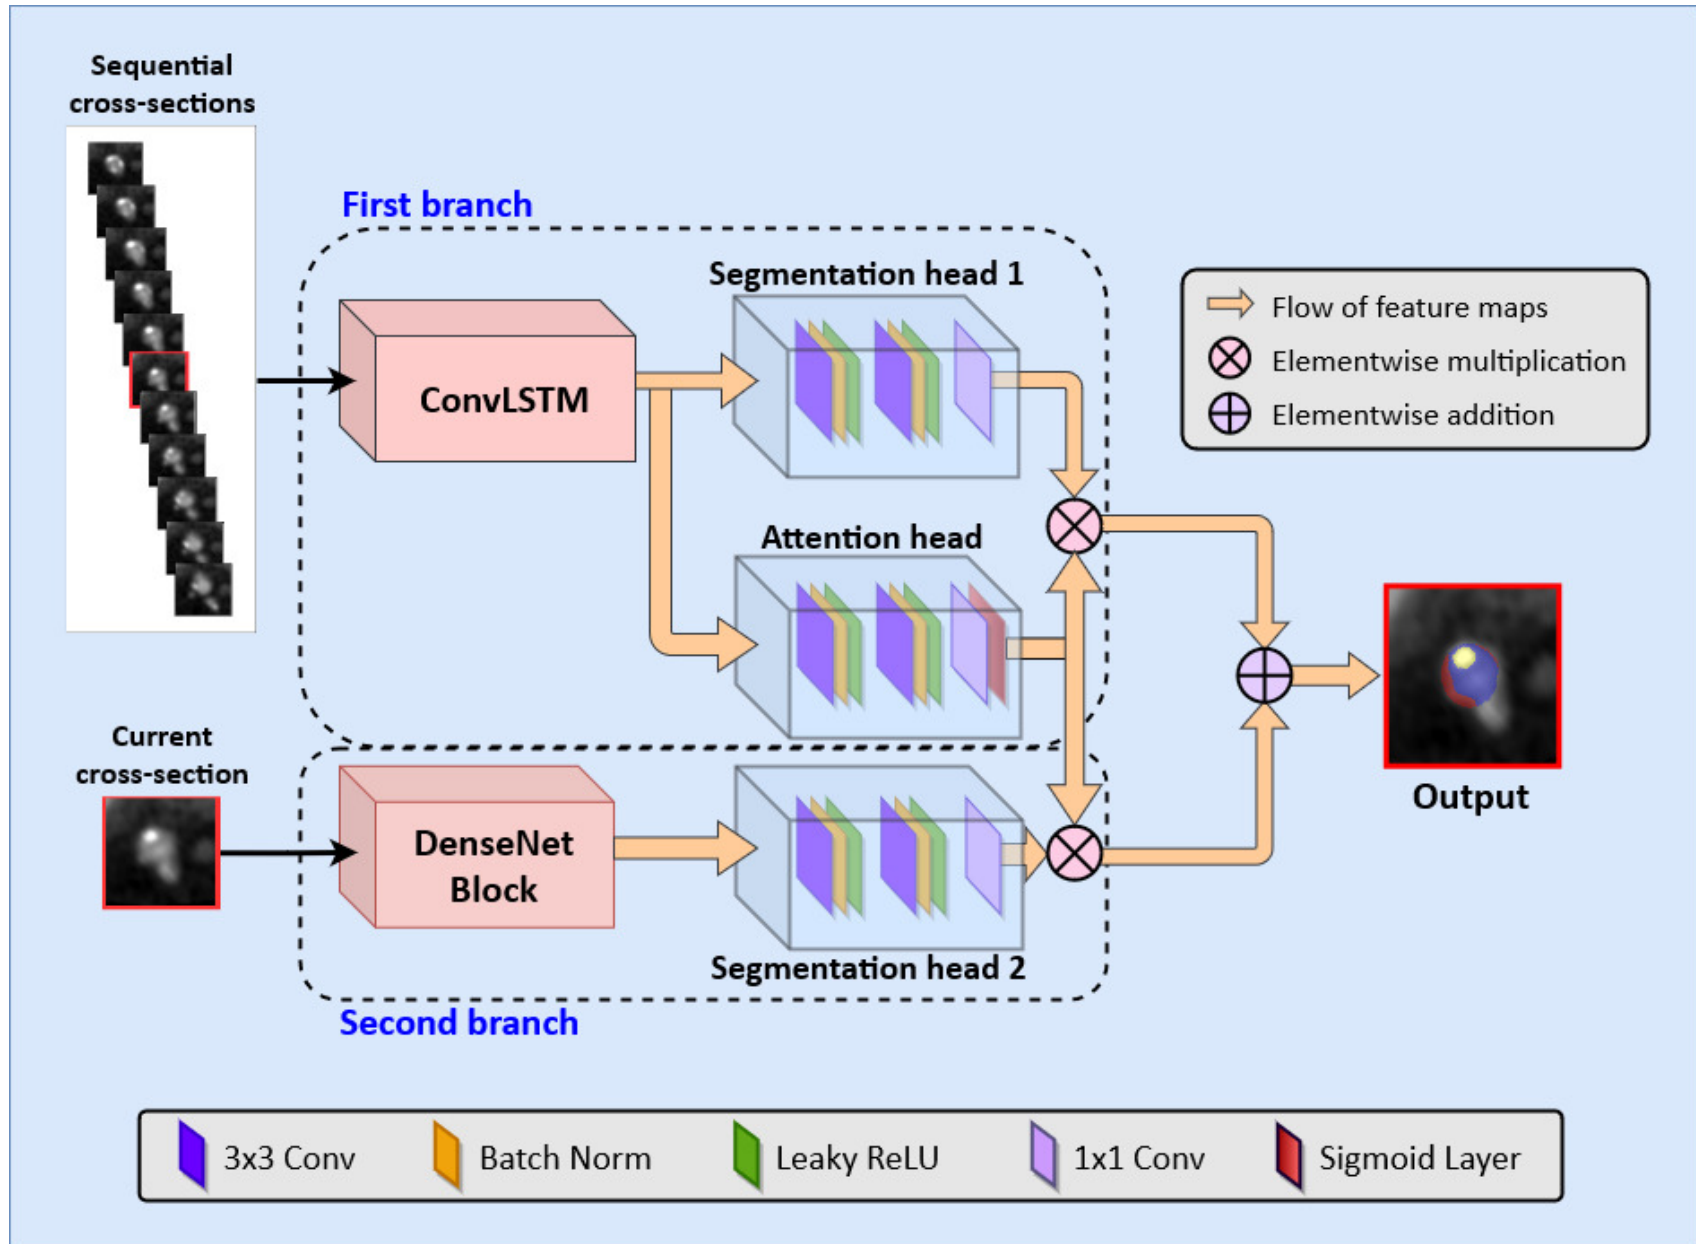

**Supplementary Figure 3. Noncalcified and calcified plaque volume measured by deep learning versus expert readers in the test set**

Bland-Altman plots of (A) noncalcified and (B) calcified plaque volume measured by deep learning (DL) versus expert readers in 1,901 lesions from the overall test set.

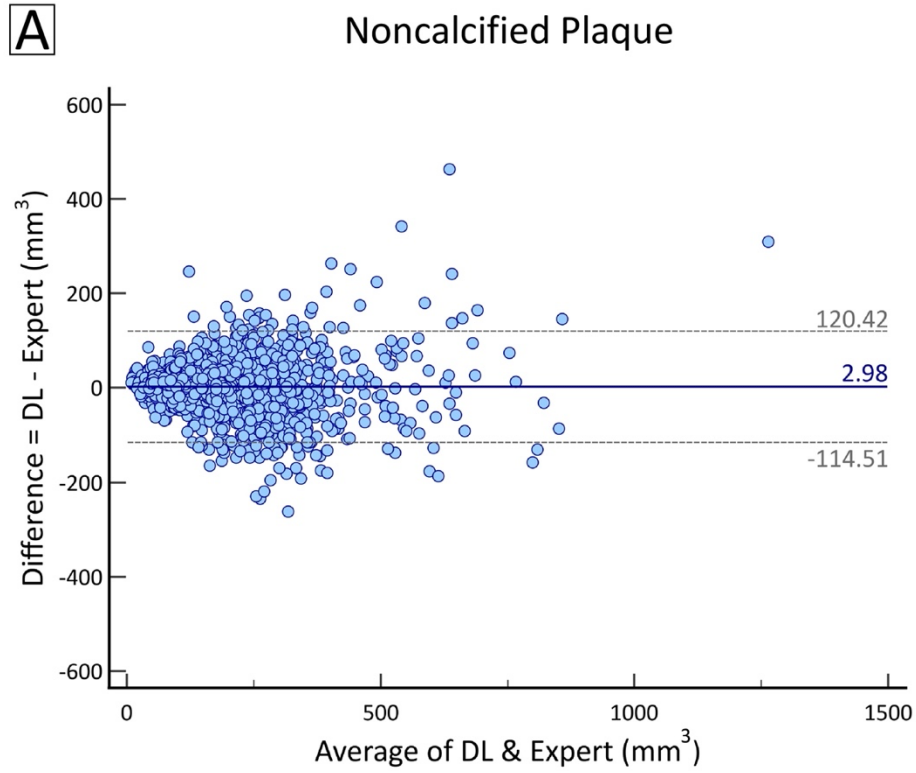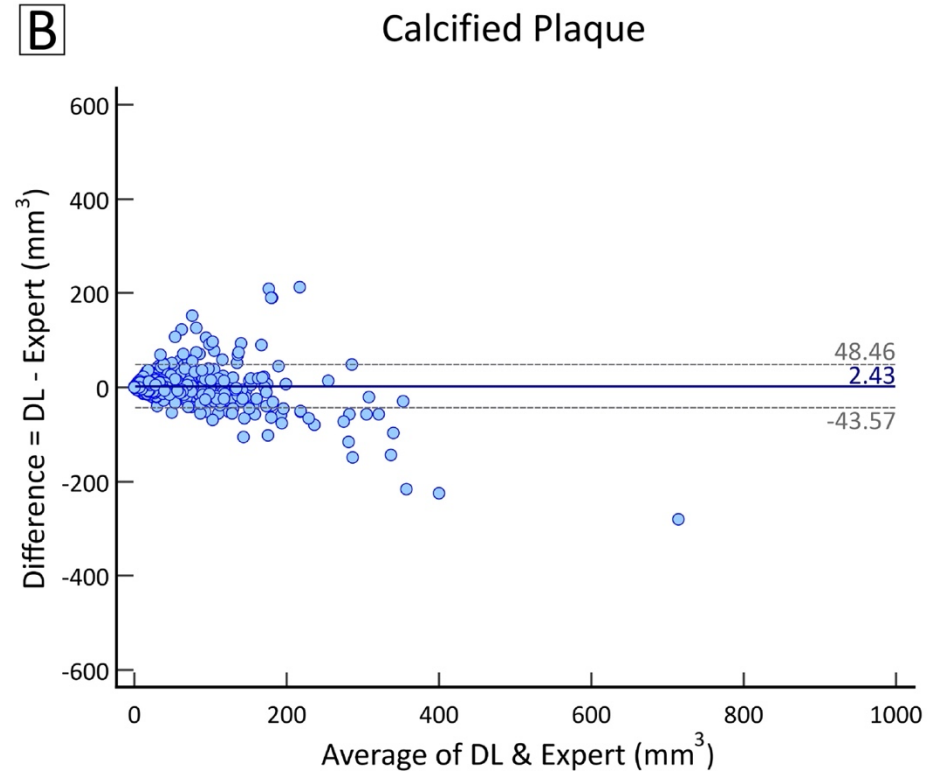

**Supplementary Figure 4. Total plaque volume measured by deep learning versus expert readers in the external validation cohort**

(A) Correlation and (B) Bland-Altman plots comparing total plaque volume measured by deep learning (DL) versus expert readers in 1,081 lesions from the external validation cohort.

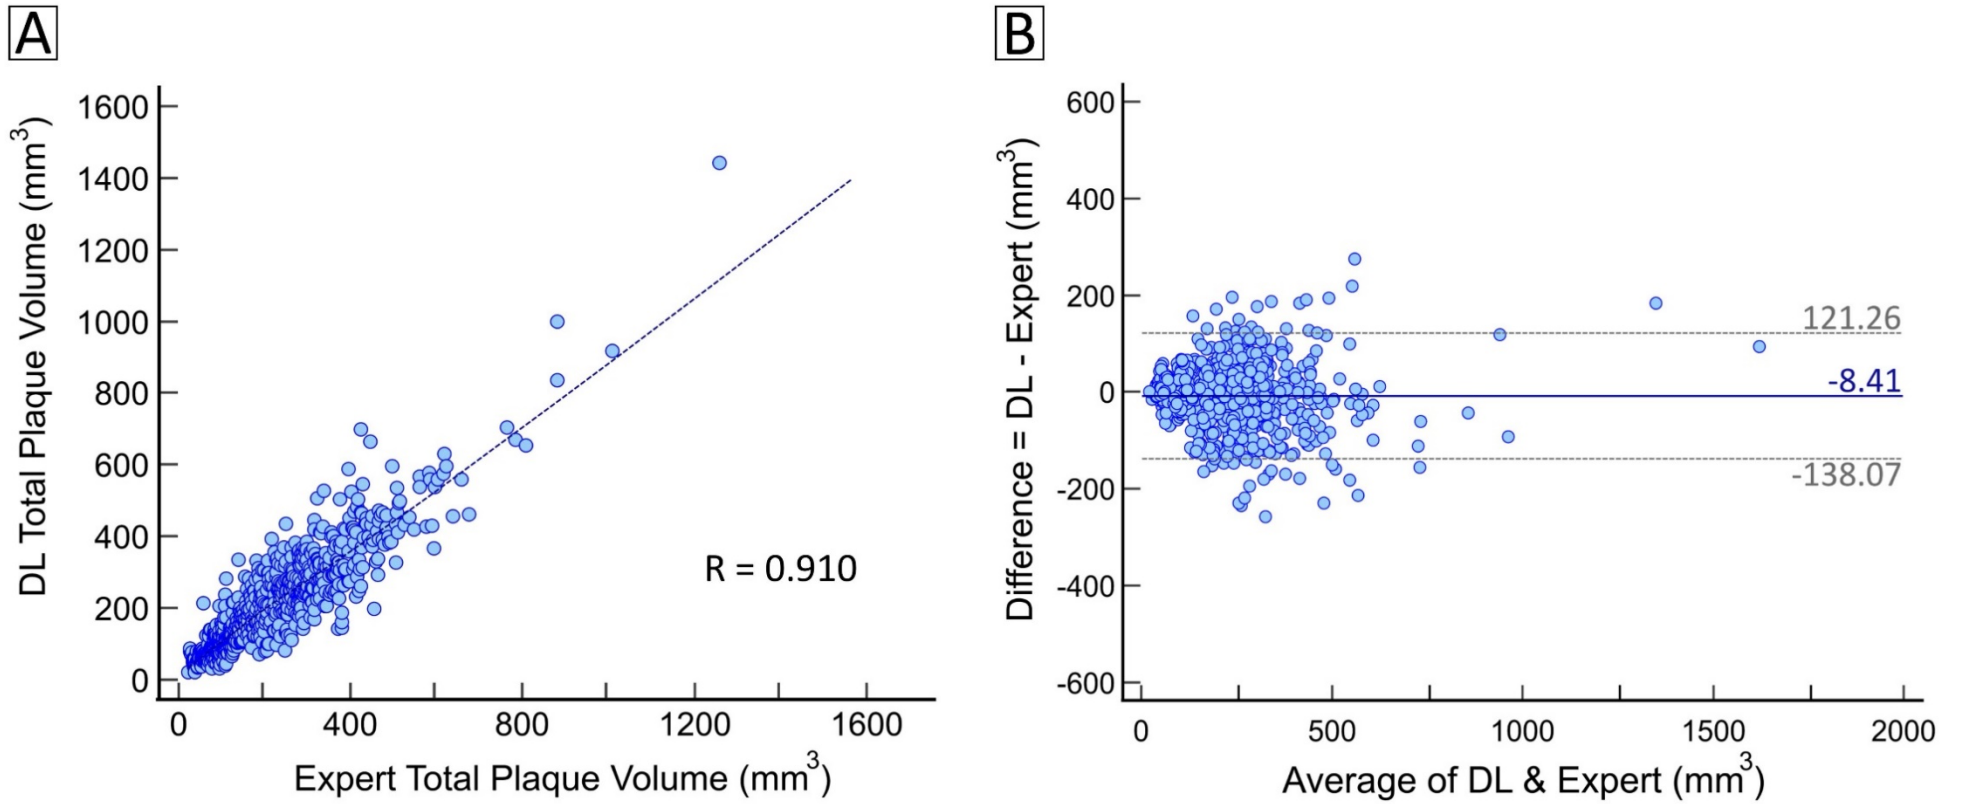



**Supplementary Figure 6. Prognostic value of deep learning-based low-attenuation plaque burden for myocardial infarction**

Kaplan-Meier cumulative incidence curves of fatal or nonfatal myocardial infarction (MI) in patients from the SCOT-HEART trial stratified by low-attenuation plaque burden above or below 4%, the optimal cut-off determined by receiver operating characteristic curve analysis.

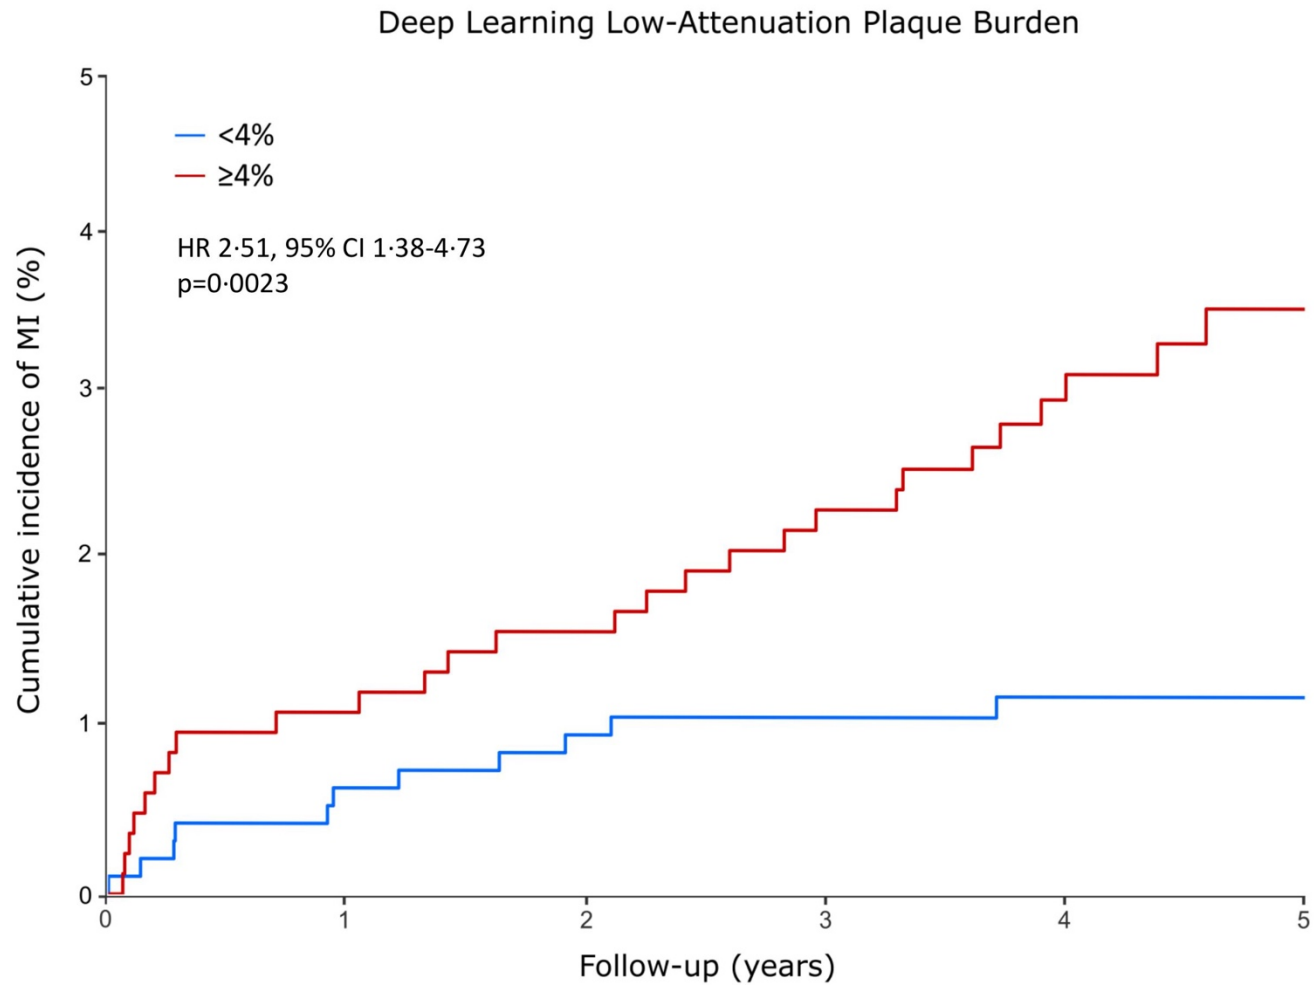

Number at risk

|     |     |     |     |     |     |     |
|-----|-----|-----|-----|-----|-----|-----|
| <4% | 786 | 778 | 772 | 769 | 596 | 340 |
| ≥4% | 825 | 815 | 807 | 798 | 648 | 357 |
